# Supplementary material for: Scratch to sensitize: scratch-induced sensitivity enhancement in semiconductor thin-film sensors
Source: Royal Society of Chemistry journal article supplement (doi:10.1039/c9nr03984h), 2019-01-01
Supplement: c9nr03984h1.pdf [file c9nr03984h1.pdf]

## Supplementary Information

# **Scratch to sensitize: scratch-induced sensitivity enhancement in semiconductor thin-film sensors**

*Geonhee Lee, Min Choi, Soo Sang Chae, Du Won Jeong, Won Jin Choi, Seulgi Ji, Yun Ho Kim, Ji  
Woon Choi, Tae Il Lee, Incheol Cho, Inkyu park, Sun Sook Lee, Sungsu Park, Noejung Park,  
Hyunju Chang and Jeong-O Lee\**

## Contents

Figure S1. Statistical analysis of the number of ZnO scratch lines per unit area

Figure S2. SEM images of ZnO powder and ground ZnO powder

Figure S3. XPS analyses of ZnO powder and ground ZnO powder

Figure S4. AFM images of sol-gel-prepared ZnO thin films

Figure S5. XPS spectra of sol-gel prepared ZnO thin films

Figure S6. XPS spectra of  $\text{In}_2\text{O}_3$  and S- $\text{In}_2\text{O}_3$  films

Figure S7. XPS spectra of  $\text{SnO}_2$  and S- $\text{SnO}_2$  films

Figure S8. XPS analyses of  $\text{TiO}_2$  and S- $\text{TiO}_2$

Figure S9.  $\text{NO}_2$  gas reactivity data for ZnO and S-ZnO

Figure S10. The  $\text{NO}_2$  gas sensitivities and responses of the ZnO and S-ZnO samples

Figure S11. Sensor test of ZnO on membrane filter paper

Figure S12. Electrical properties of S-ZnO (Horizontal, Vertical)

Figure S13. AFM image showing the scratches on  $\text{SiO}_2$

Figure S14. Electrical characteristics of semiconducting ZnO thin film and S-ZnO fabricated with semiconducting ZnO thin film

Figure S15. Sensor response comparison of semiconducting ZnO thin film and S-ZnO (semiconducting)

Figure S16. AFM images of  $\text{TiO}_2$  and S- $\text{TiO}_2$  and atomic models of their surfaces

Figure S17. XPS spectra of S-ZnO before and after thermal annealing

Figure S18. Long-term stability of a S-ZnO sensor device

Figure S19. Humidity response properties of ZnO and S-ZnO devices.

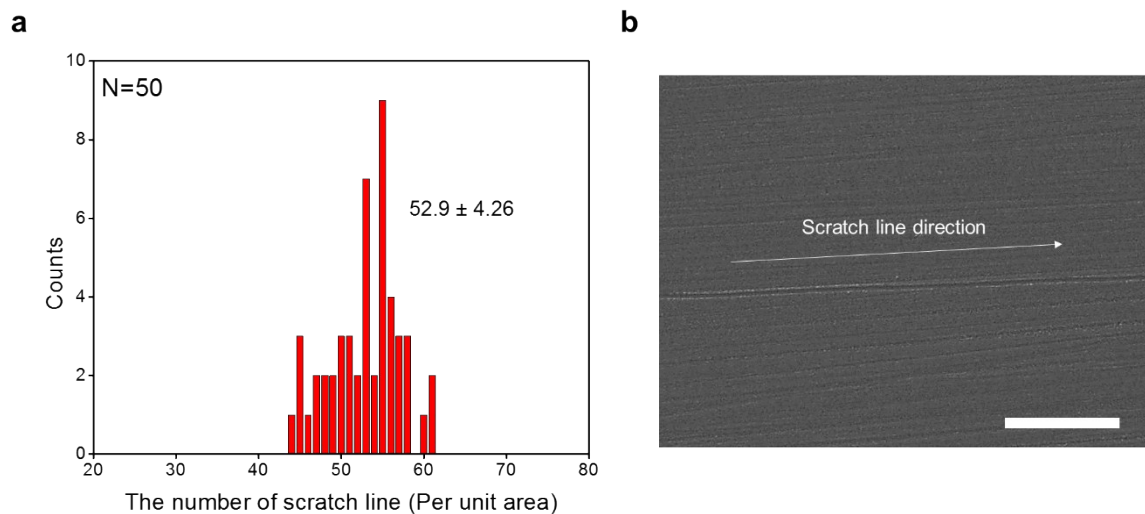

**Figure S1.** Statistical analysis of the number of ZnO scratch lines per unit area. SEM images were obtained at 50 points at regular intervals of 2 mm (horizontally) x 4 mm (vertically) from a 1.8 cm x 1.6 cm area of a 2 cm x 2 cm substrate. Figure S1b shows a representative SEM image of a scratched substrate. (scale bar : 1  $\mu\text{m}$ ) As shown in the figure, the scratch lines are fairly uniformly distributed over the  $\sim\text{cm}$  scale substrate, with  $\sim 16$  lines per 1  $\mu\text{m}$ .

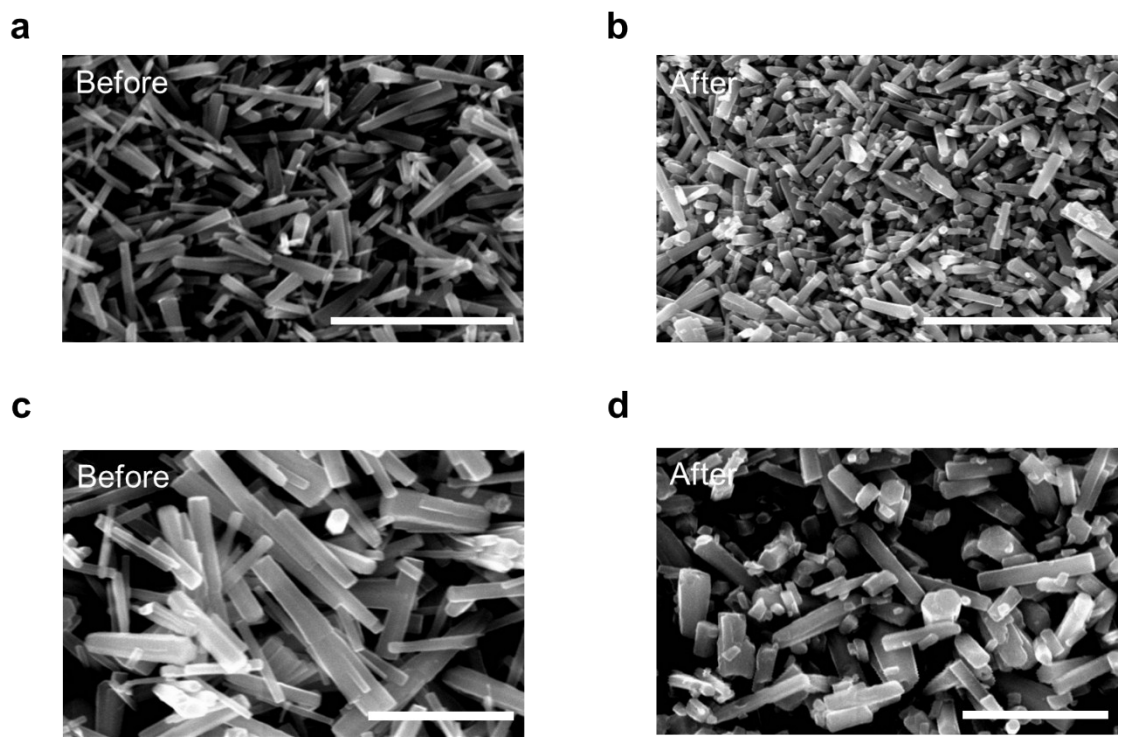

**Figure S2.** SEM images of ZnO powder and ground ZnO powder. (a) and (c) ZnO powder produced using the hydrothermal process.(b), (d) Ground ZnO powder made by grinding ZnO powder using a mortar. Scale bars in (a), (b) represent 5  $\mu\text{m}$  and those in (c), (d) represent 2  $\mu\text{m}$ .

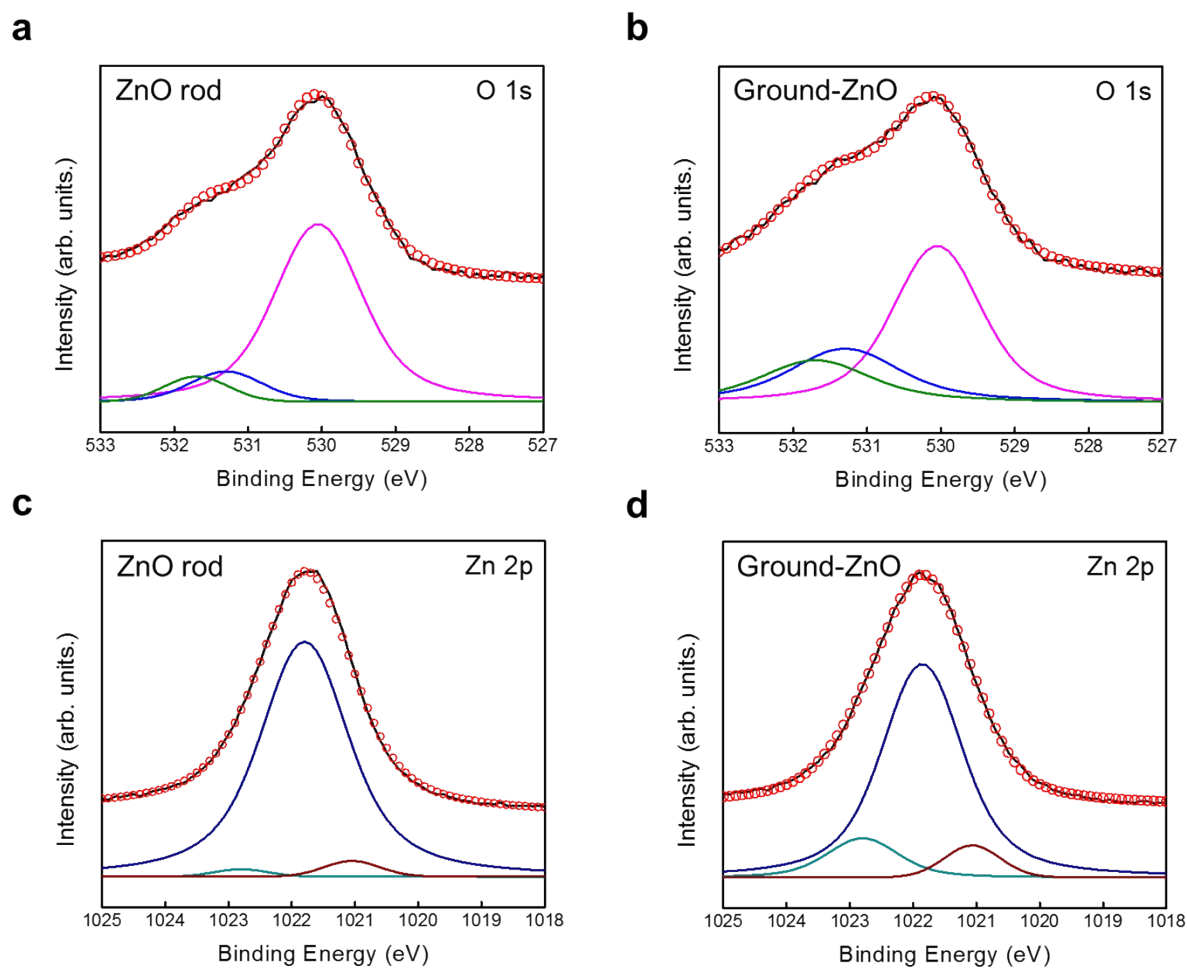

**Figure S3.** XPS analyses of ZnO powder and ground ZnO powder. Figures S2(a),(c) from ZnO powder and Figures S2(b),(d) from ground ZnO. O 1s peak was fitted by three peaks: those of the ZnO lattice in pink (529.9 eV), oxygen defect in green (531.4 eV), and hydroxyl groups of ZnO in blue (531.7 eV). Also, the Zn 2p peak was fitted by three peaks: those of the zinc hydroxide in dark cyan (1022.8 eV), ZnO lattice in navy (1021.7 eV), and Zn metal in wine (1021.1 eV).

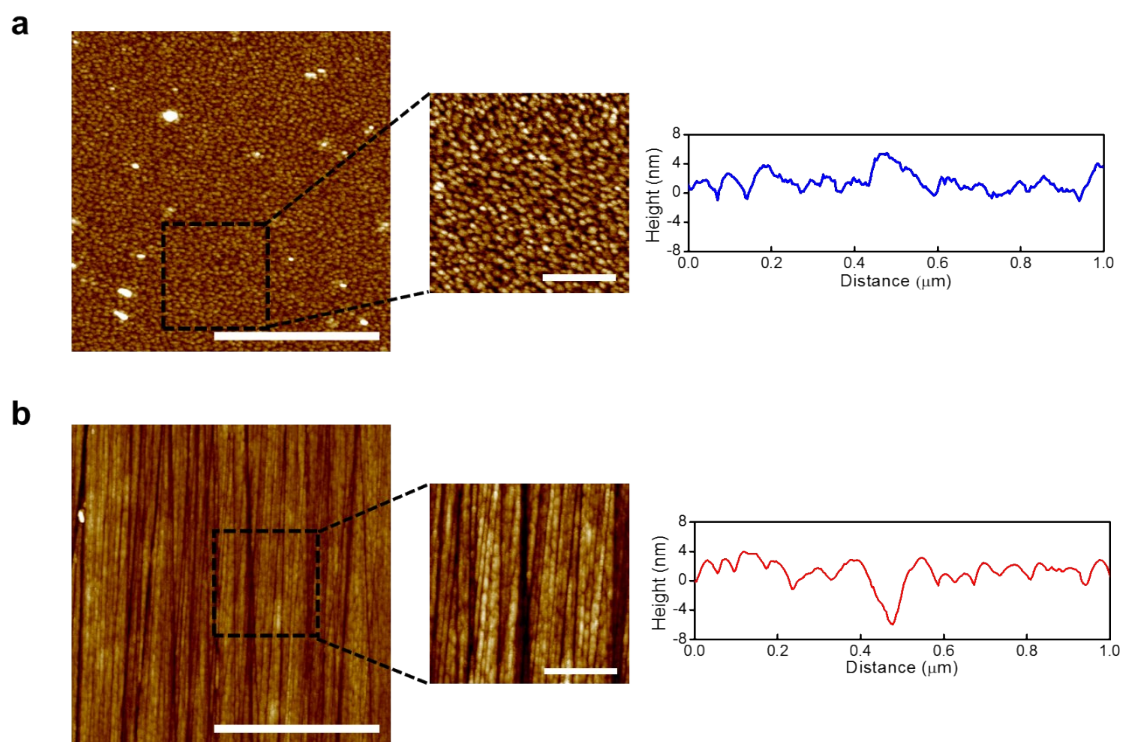

**Figure S4.** AFM images of sol-gel-prepared ZnO thin films (a) before and (b) after being scratched. Scale bars in the right images each represent 5  $\mu\text{m}$  and those in the left images each represent 300 nm.

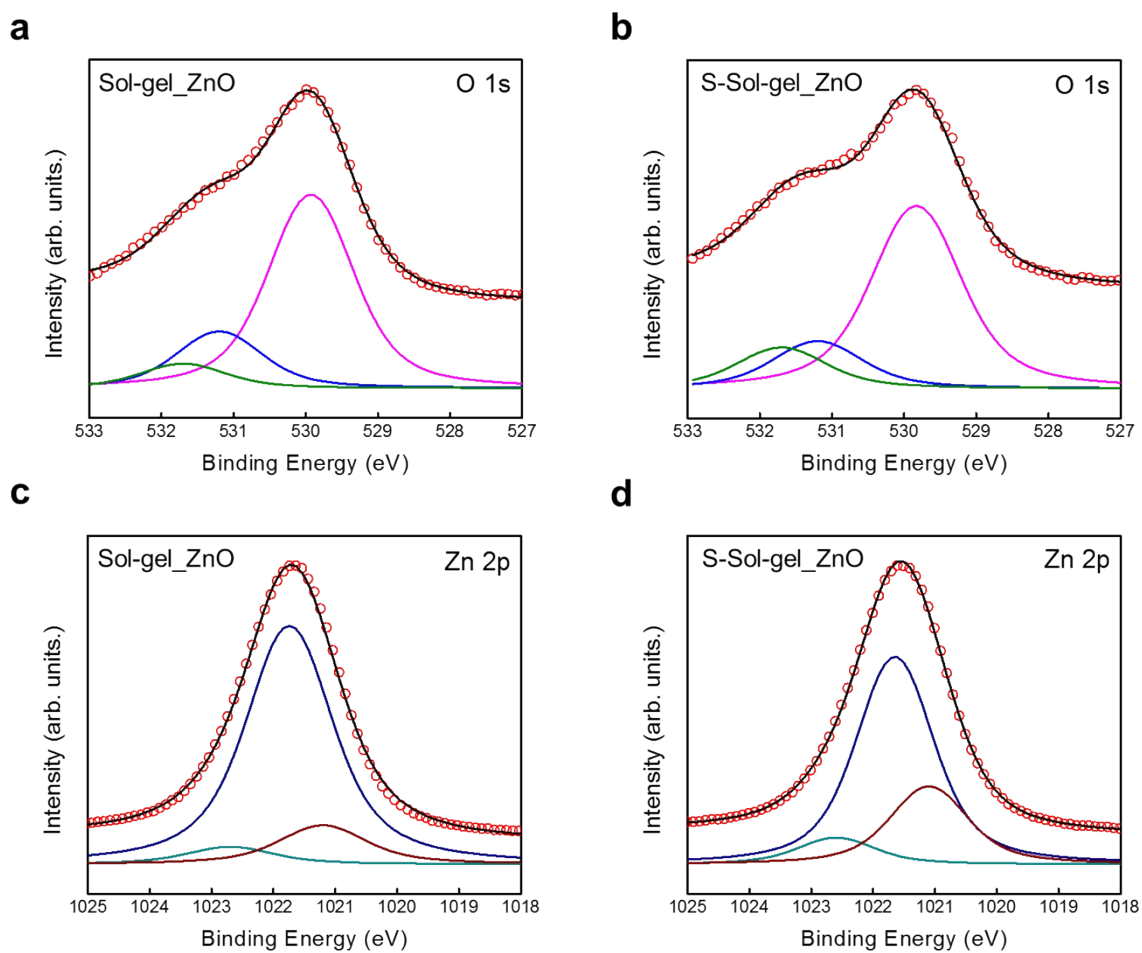

**Figure S5.** XPS spectra of sol-gel prepared ZnO thin films. (a), (c) before and (b), (d) after being scratched. Each O 1s peak was fitted by three peaks: those of the ZnO lattice in pink (529.9 eV), oxygen defect in green (531.4 eV), and hydroxyl groups of ZnO in blue (531.7 eV). Each Zn 2p peak was fitted by three peaks: those of zinc hydroxide in dark cyan (1022.8 eV), ZnO lattice in navy (1021.7 eV), and Zn metal in wine (1021.1 eV).

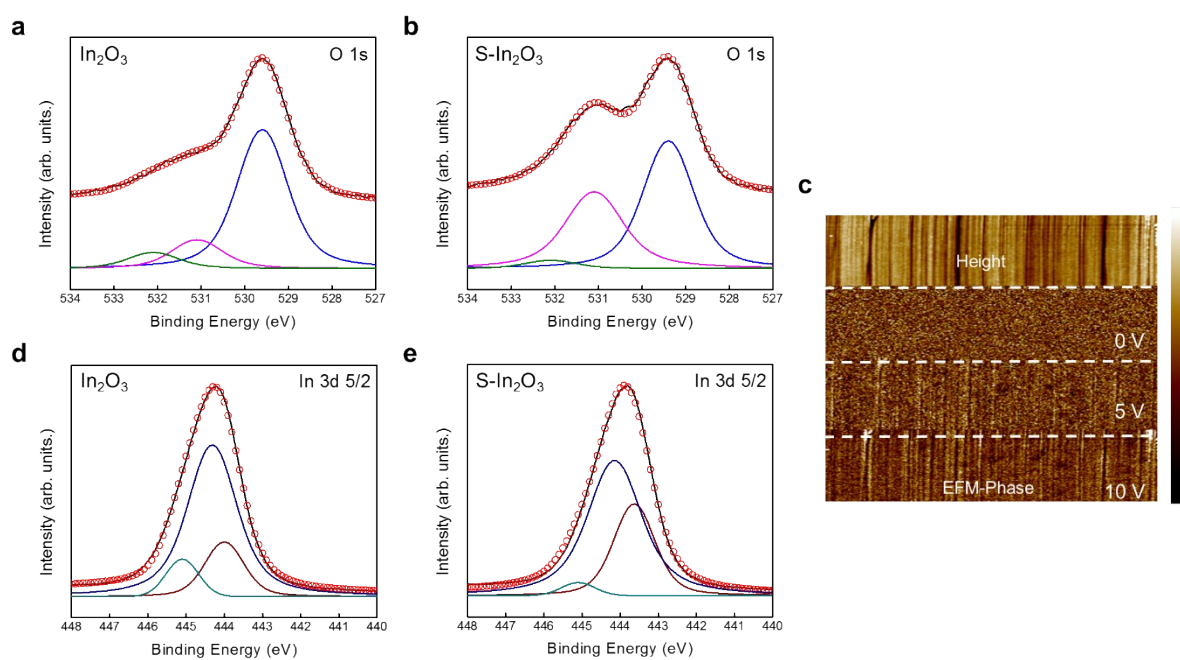

**Figure S6.** XPS spectra of In<sub>2</sub>O<sub>3</sub> and S-In<sub>2</sub>O<sub>3</sub> films. Figure S6(a),(d) from normal In<sub>2</sub>O<sub>3</sub> film and Figure S6b,e from a scratched In<sub>2</sub>O<sub>3</sub> film. Each O 1s peak was fitted by three peaks: those of the In<sub>2</sub>O<sub>3</sub> lattice in blue (529.5 eV), oxygen defect in pink (531.1 eV), and hydroxyl groups of the In<sub>2</sub>O<sub>3</sub> in green (532.3 eV). Also, each In 3d 5/2 peak was fitted by three peaks: those of In metal in dark cyan (443.7 eV), In<sub>2</sub>O<sub>3</sub> lattice in navy (444.3 eV), and In(OH)<sub>3</sub> in wine (445.2 eV). (c) The AFM height and EFM-Phase image of the S-In<sub>2</sub>O<sub>3</sub> region; the EFM image was obtained with varying the applied voltage at a fixed tip height of 100 nm.



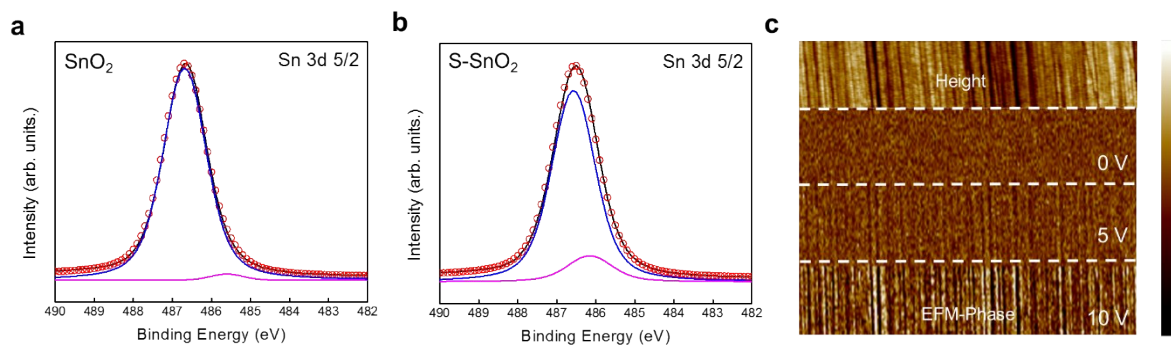

**Figure S7.** XPS spectra of SnO<sub>2</sub> and S-SnO<sub>2</sub> films. (a) SnO<sub>2</sub> film spectrum. (b) S-SnO<sub>2</sub> film spectrum. In 3d 5/2 peak was fitted by two peaks: those of the Sn metal in pink (486.1 eV) and SnO<sub>2</sub> lattice in blue (486.6 eV). (c) The AFM height and EFM-Phase image of the S-SnO<sub>2</sub>; the EFM image was obtained with varying the applied voltage at a fixed tip height of 100 nm.

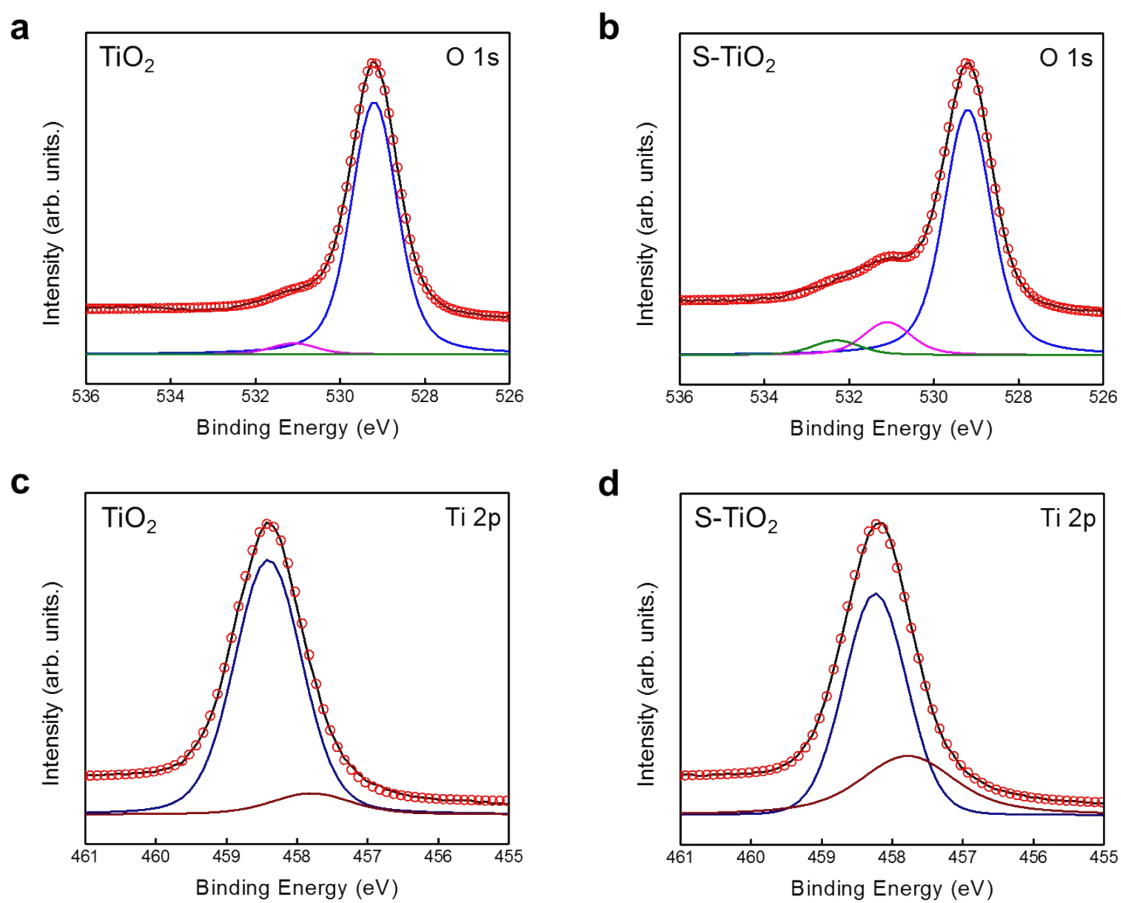

**Figure S8.** XPS analyses of TiO<sub>2</sub> and S-TiO<sub>2</sub>. Right (Figure S8(a),(c)) TiO<sub>2</sub> data. Left (Figure S8(b),(d)) S-TiO<sub>2</sub> data. The O 1s peak was fitted by three peaks: those of the TiO<sub>2</sub> (Ti<sup>4+</sup>) lattice in blue (529.3 eV), Ti<sub>2</sub>O<sub>3</sub> (Ti<sup>3+</sup>) in pink (531.1 eV), and TiO(C/H)Ti (absorption water) in green (532.3 eV). Also, the Ti 2p peak was fitted by two peaks: those of the TiO<sub>2</sub> (Ti<sup>4+</sup>) lattice in navy (458.5 eV) and Ti<sub>2</sub>O<sub>3</sub> (Ti<sup>3+</sup>) in brown (457.8 eV).

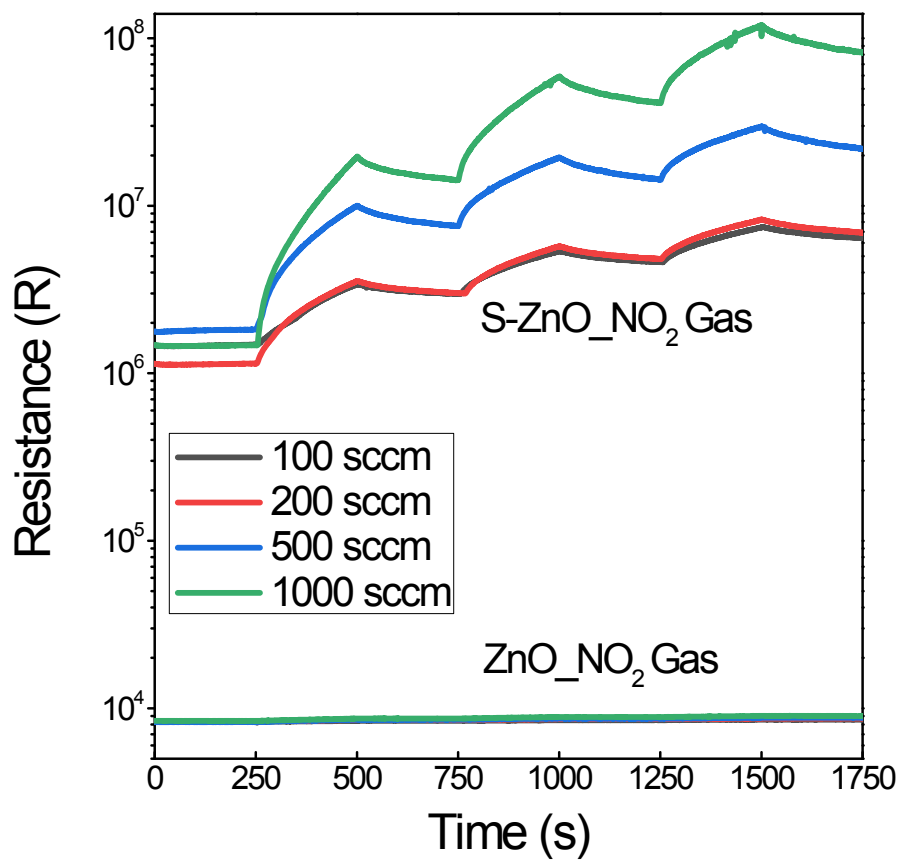

**Figure S9.** NO<sub>2</sub> gas reactivity data for ZnO and S-ZnO measured using the resistance value (R). Resistance data are shown on a log scale.

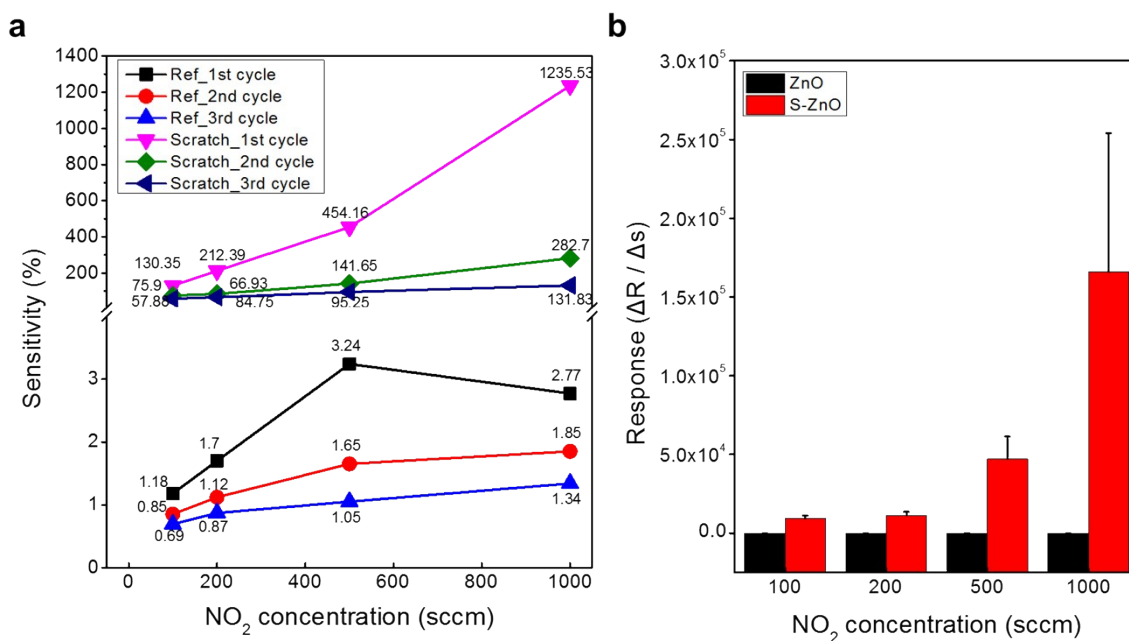

**Figure S10.** (a) The NO<sub>2</sub> gas sensitivities and (b) responses of the ZnO and S-ZnO samples. The sensor sensitivity and response of each sample was calculated by measuring them sequentially three times with the same NO<sub>2</sub> concentration (sccm). (Sensitivity (%):  $(R_a - R_0)/R_a \times 100$ , Response:  $(R_a - R_0)/\Delta s$ ).

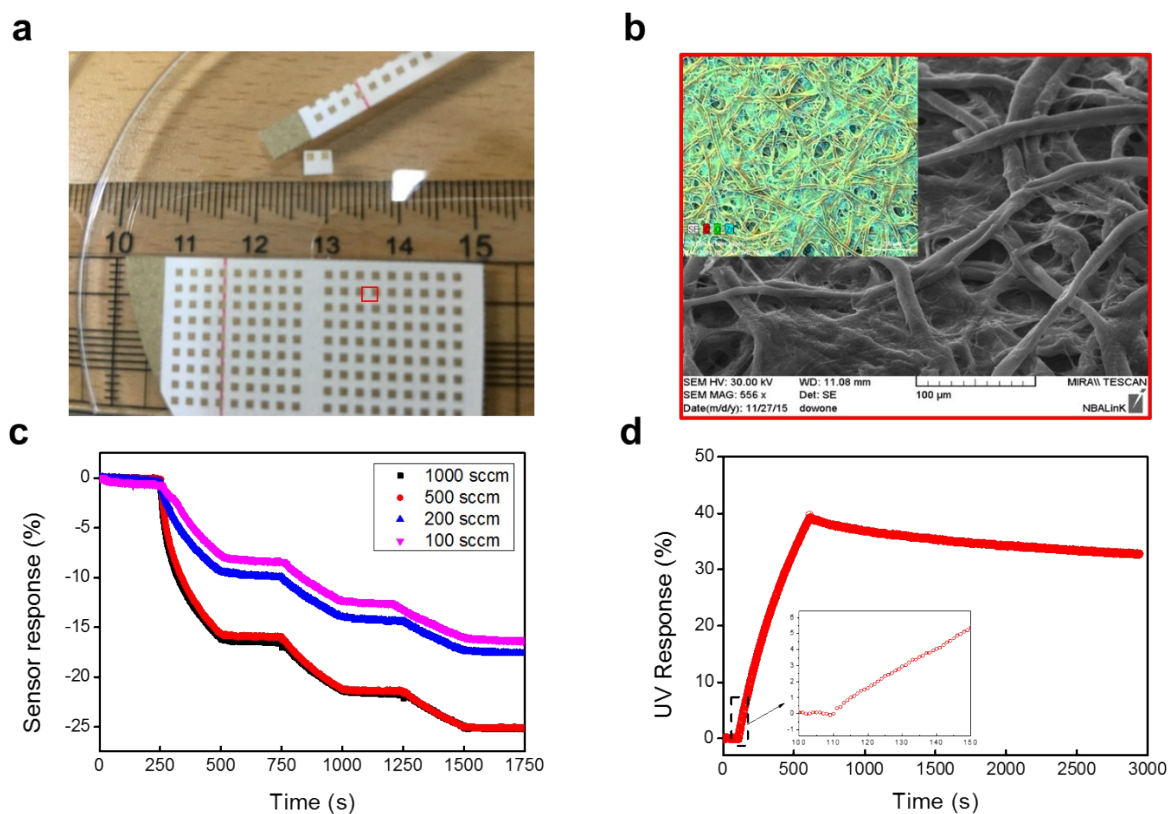

**Figure S11.** (a) Image of ZnO deposited using ALD on filter paper in order to maximize the effectiveness of the ZnO surface at sensing gas. A stencil mask was placed on the ZnO film and an Al electrode was deposited by thermal evaporation. The small red box in the photograph is the region analyzed with SEM in Figure S11b. (b) SEM image of ZnO on filter paper, and corresponding EDS map, which confirmed the presence of ZnO. (c) Responses of the gas sensor to NO<sub>2</sub> as a function of flow rate. (d) UV response data after the sensor response.

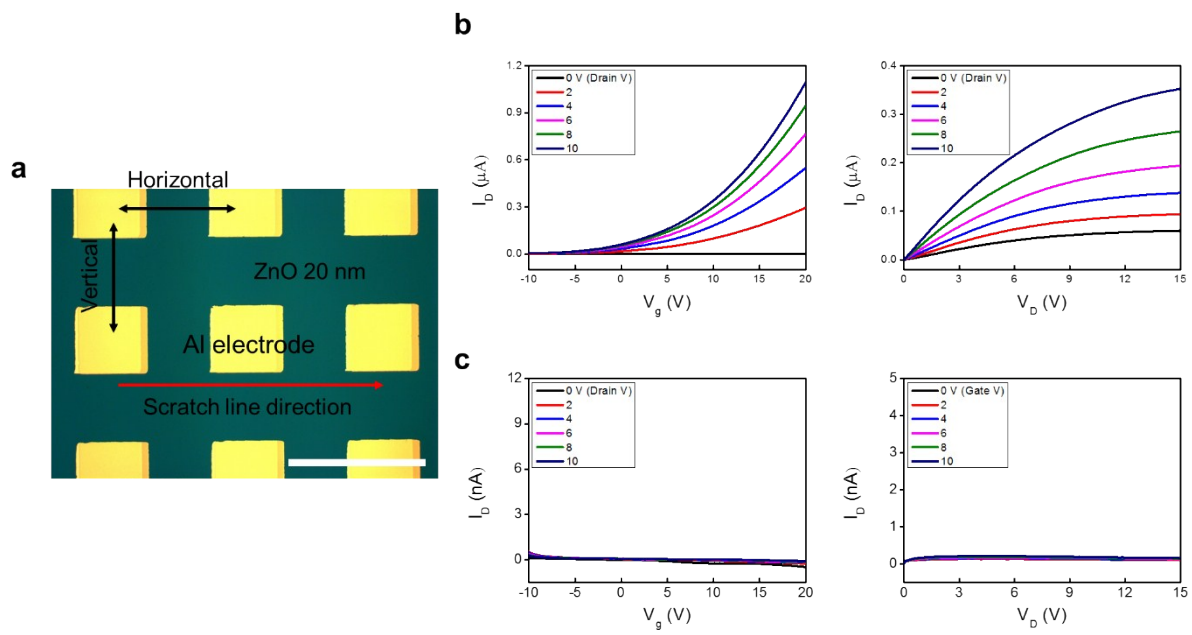

**Figure S12.** Electrical properties of S-ZnO fabricated with a 20 nm-thick ZnO film grown using ALD. (a) Optical microscope image of a device that shows the direction of the scratch. Scale bar; 1000  $\mu\text{m}$ . (b) I-Vg (left) and I-V characteristics of S-ZnO measured parallel to the scratch direction. (c) I-Vg (left) and I-V characteristics of S-ZnO measured perpendicular to the scratch direction.

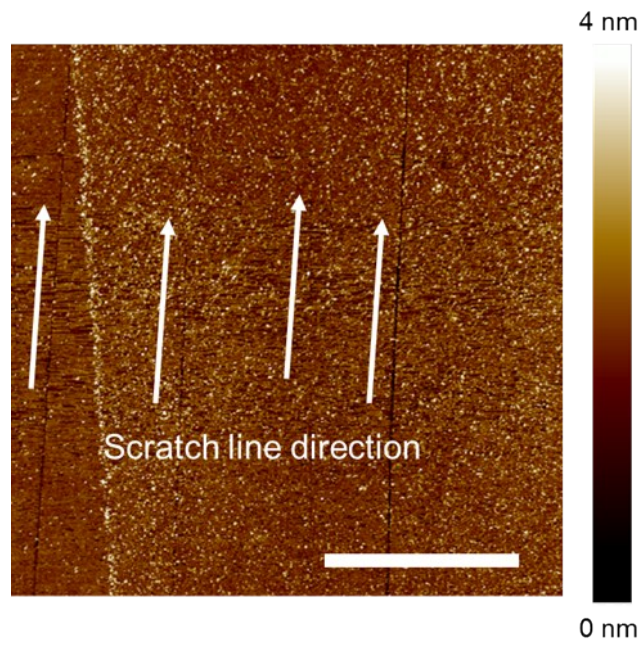

**Figure S13.** AFM image showing the scratches on  $\text{SiO}_2$ -ZnO (S-ZnO) on a  $\text{SiO}_2/\text{Si}$  substrate was rinsed with nitric acid (nitric acid (60%) : Di-W = 1 : 200) for 1 s to remove the S-ZnO layer. Scratched lines engraved on the  $\text{SiO}_2/\text{Si}$  substrate indicated that the use of scratch lithography effectively cut into the ZnO nanoribbons from the ZnO thin film. Scale bar: 3  $\mu\text{m}$ .

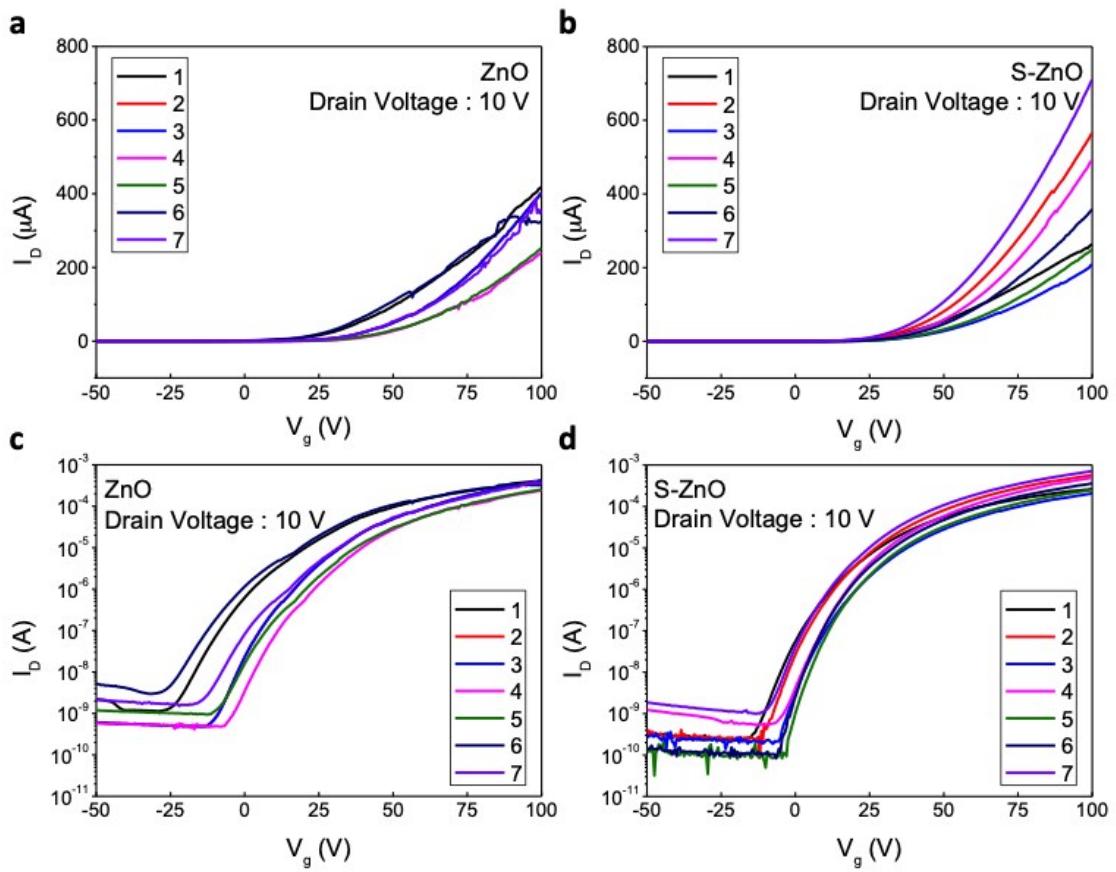

**Figure S14.** Electrical characteristics of semiconducting ZnO thin film and S-ZnO fabricated with semiconducting ZnO thin film. Transfer characteristics of ZnO and S-ZnO (semiconducting) were measured with 10 V (drain voltage). (a) and (b) show linear scale plot and (c),(d) log scale respectively, measured from 7 different samples of ZnO (semiconducting) and S- ZnO (semiconducting).



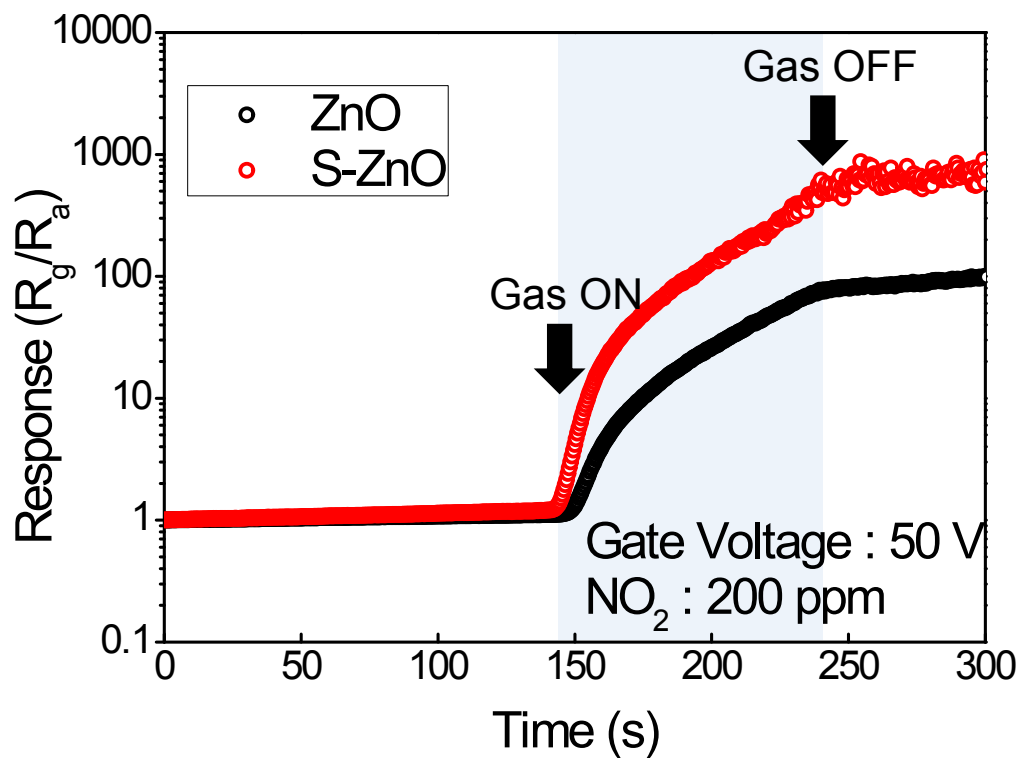

**Figure S15.** Sensor response comparison of semiconducting ZnO thin film (black) and S-ZnO (semiconducting) (red). Total flow rates of NO<sub>2</sub> and N<sub>2</sub> balancing gas were 500 sccm each at RT.

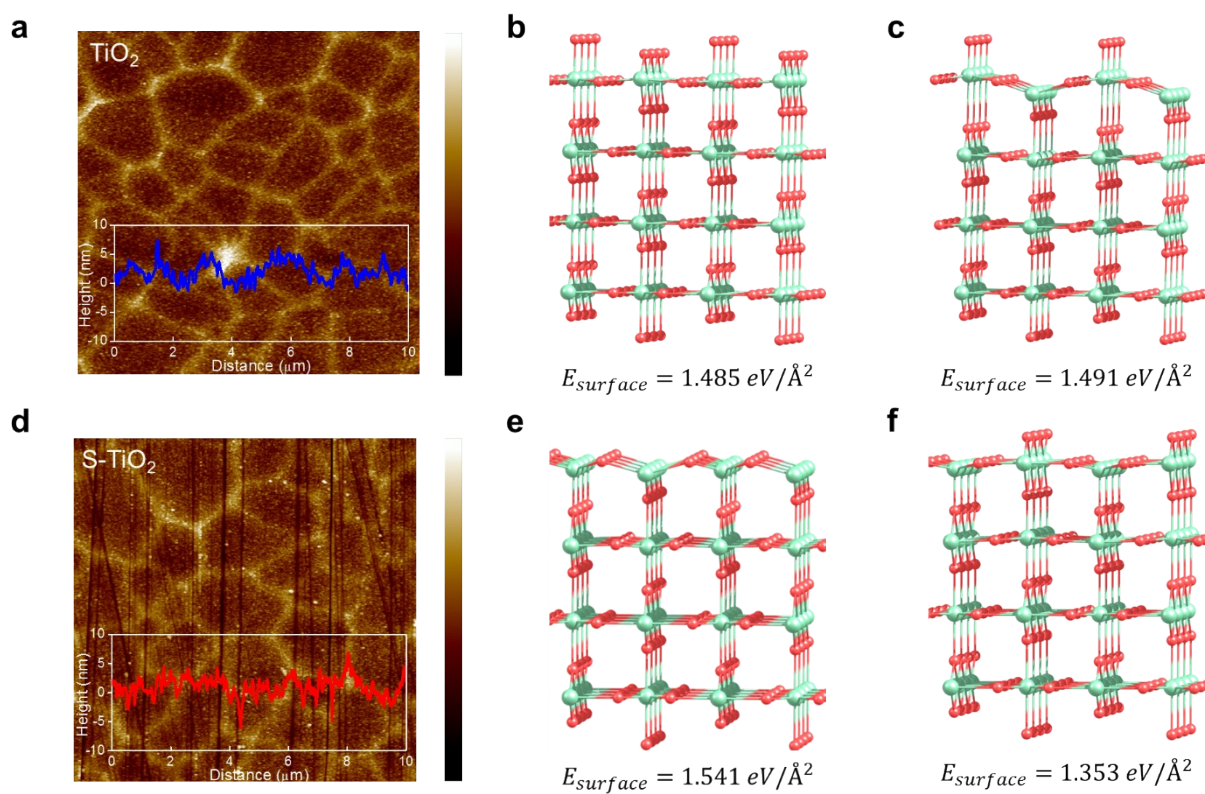

**Figure S16.** AFM images of (a) TiO<sub>2</sub> and (d) S-TiO<sub>2</sub> and atomic models of their surfaces. (b), (c), (e) and (f) Various surface configurations and surface energies of S-TiO<sub>2</sub>(110); the geometry of the configuration shown in (f) was used for the calculations in **Table 1** since it was determined to have the lowest surface energy value.

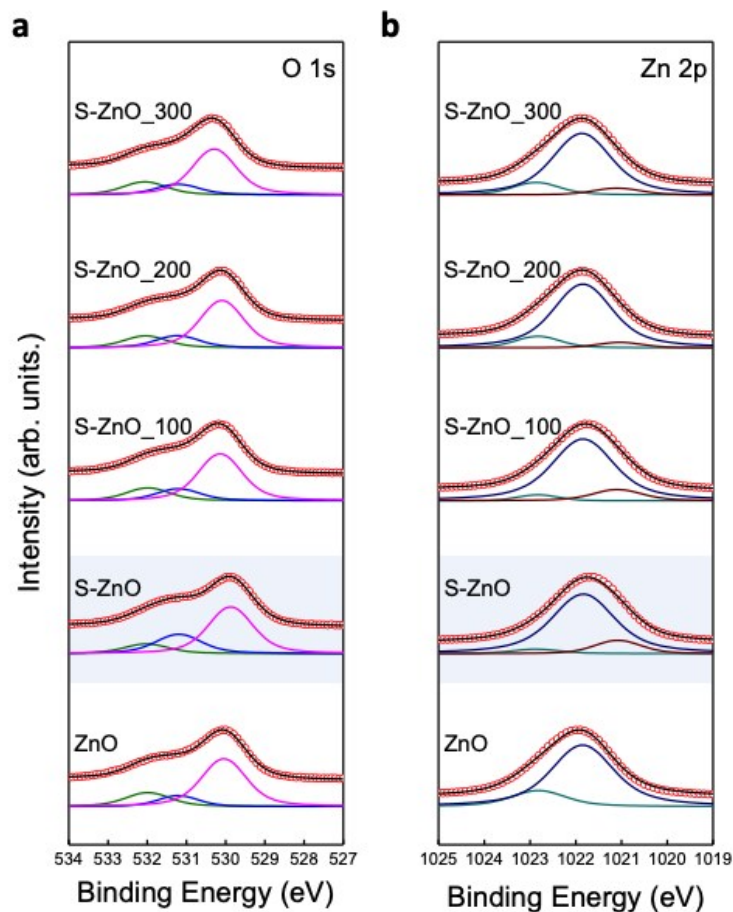

**Figure S17.** XPS spectra of S-ZnO before and after thermal annealing. (a), (b) represent O 1s and Zn 2p peak, respectively. After scratching, S-ZnO samples were heat-treated using a CVD (chemical vapor deposition) chamber at 100, 200 and 300 °C for 1 h in Air. Each O 1s peak was fitted by three peaks: those of the ZnO lattice in pink (529.9 eV), oxygen defect in green (531.4 eV), and hydroxyl groups of ZnO in blue (531.7 eV). Each Zn 2p peak was fitted by three peaks: those of zinc hydroxide in dark cyan (1022.8 eV), ZnO lattice in navy (1021.7 eV), and Zn metal in wine (1021.1 eV).

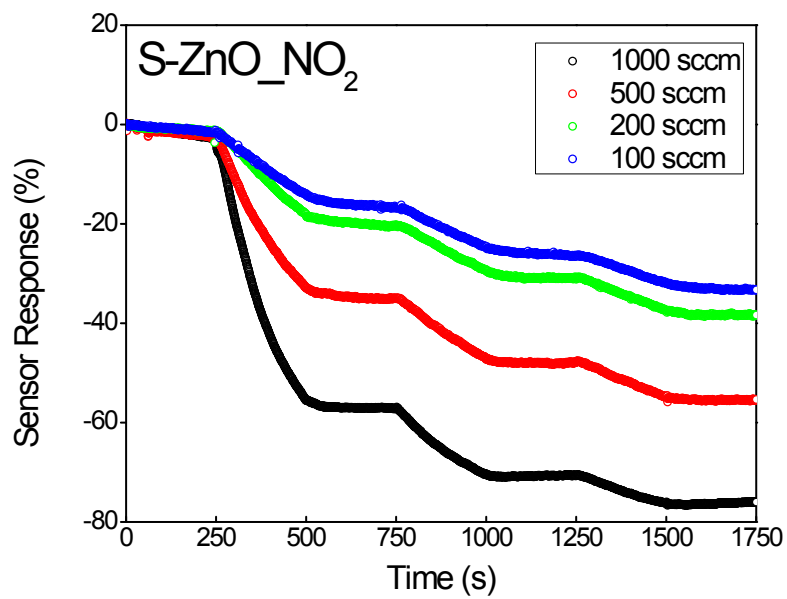

**Figure S18.** Long-term stability of a S-ZnO sensor device as indicated by measuring the sensor response after 2 months of shelf life.

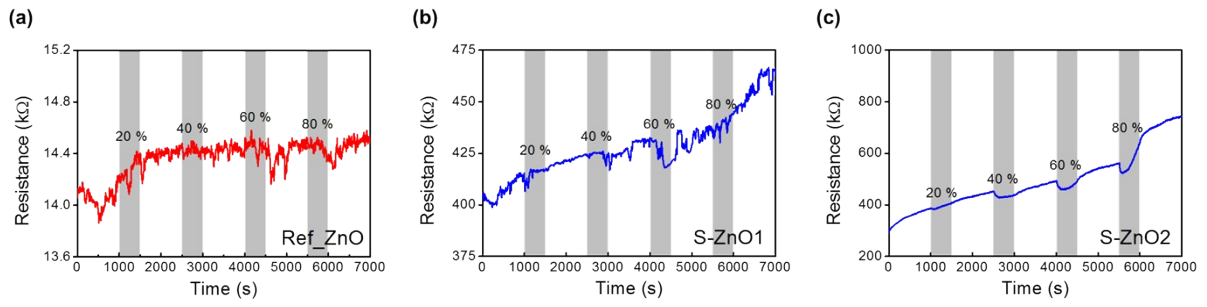

**Figure S19.** Humidity response properties. Time-dependent response sensing using ZnO (a) and S-ZnO (b-c) devices in different humidity (20-80 %) conditions. Total flow rate of N<sub>2</sub> balancing gas and H<sub>2</sub>O bubbling gas is 500 sccm
